# Supplementary material for: Assembly behavior of inclusion complexes of β-cyclodextrin with 4-hydroxyazobenzene and 4-aminoazobenzene
Source: Royal Society of Chemistry journal article supplement (doi:10.1039/b415946b), 2005-01-01
Supplement: b415946b.pdf [file b415946b.pdf]

## Supplementary Information

### Assembly Behavior of Inclusion Complexes of $\beta$ -Cyclodextrin with 4-Hydroxyazobenzene and 4-Aminoazobenzene

Yu Liu,\* Yan-Li Zhao, Yong Chen and Dong-Sheng Guo

Department of Chemistry, State Key Laboratory of Elemento-Organic Chemistry, Nankai  
University, Tianjin 300071, P. R. China

Fax: +86-22-23503625, E-mail: yuliu@public.tpt.tj.cn

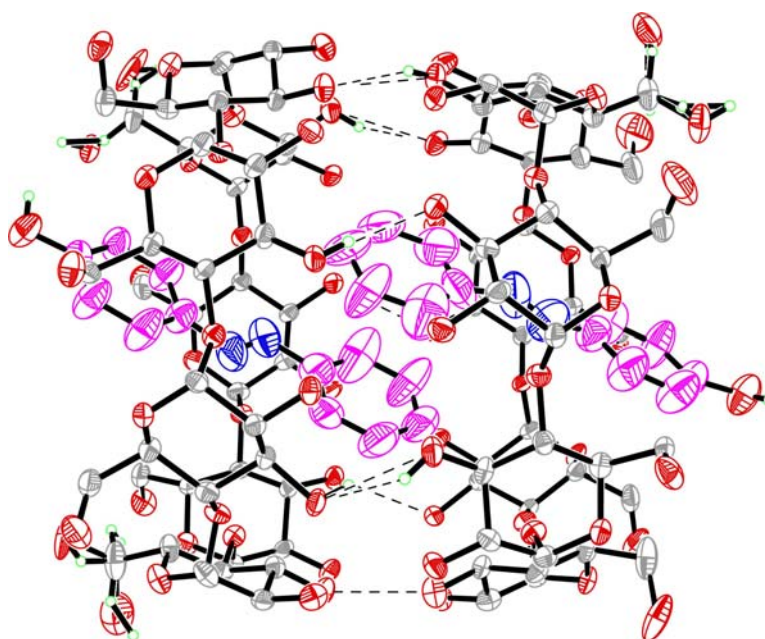

**Fig. S1** The ORTEP plot of the crystal **1**. (The probability level for the ellipsoids is 30%)

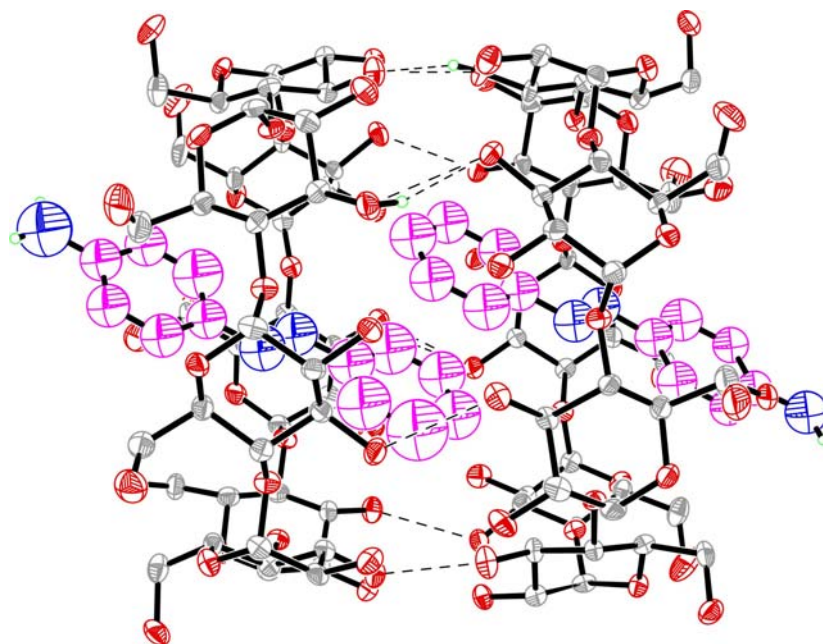

**Fig. S2** The ORTEP plot of the crystal **2**. (The probability level for the ellipsoids is 30%)

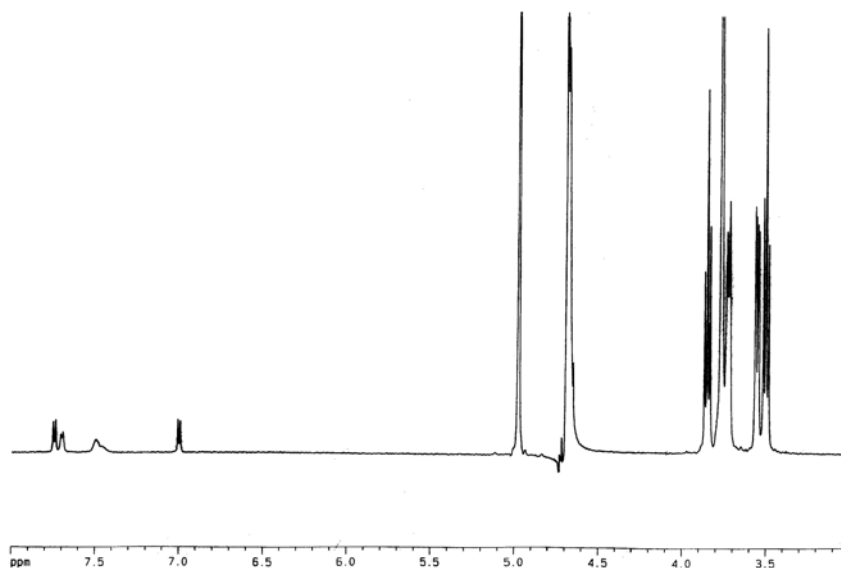

**Fig. S3** <sup>1</sup>H NMR spectrum of complex **1** ( $2.0 \times 10^{-3}$  mol dm<sup>-3</sup>) in D<sub>2</sub>O at 25 °C.

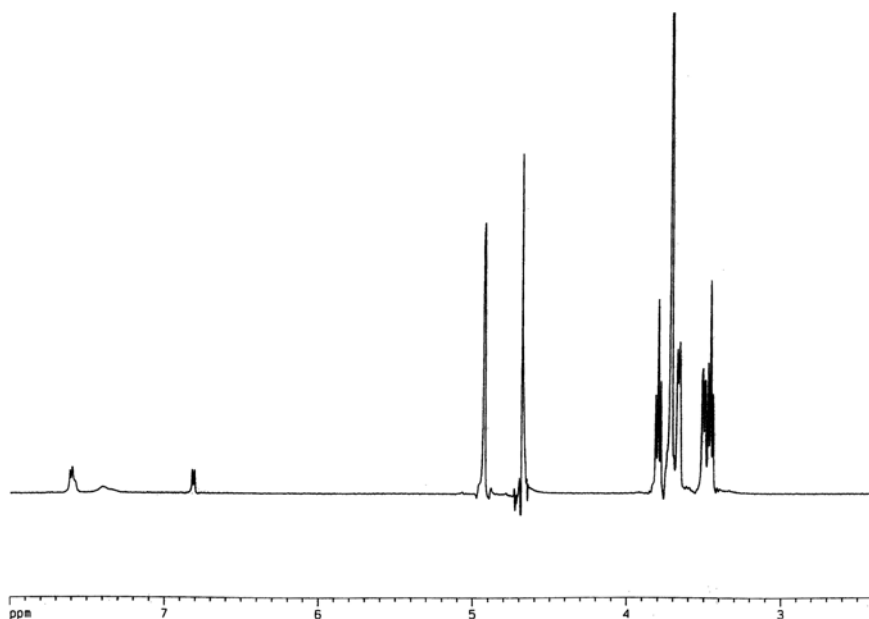

**Fig. S4** <sup>1</sup>H NMR spectrum of complex **2** ( $1.8 \times 10^{-3}$  mol dm<sup>-3</sup>) in D<sub>2</sub>O at 25 °C.

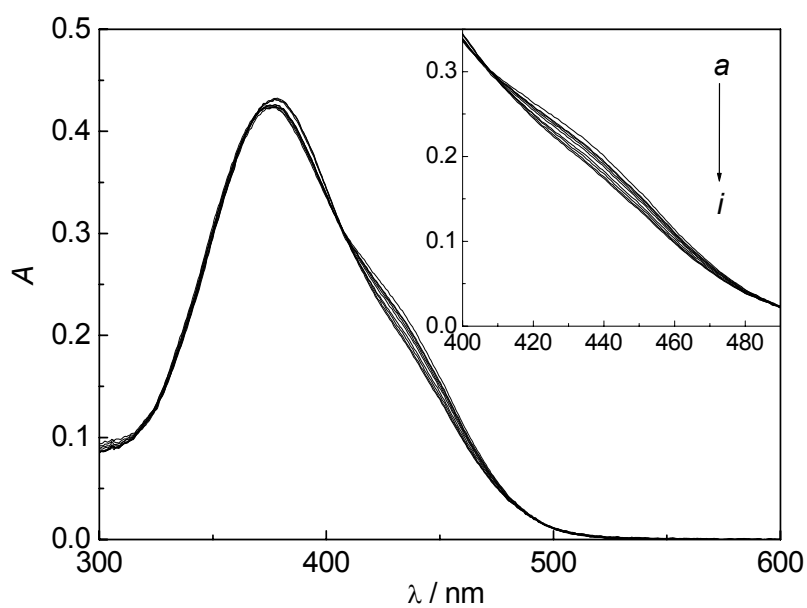

**Fig. S5** UV-vis spectra of 4-AAB ( $2.0 \times 10^{-5}$  mol dm<sup>-3</sup>) in the presence of β-CD (0, 8.4, 10.5, 15.8, 21.0, 31.5, 52.5, 73.5, and  $84.0 \times 10^{-5}$  mol dm<sup>-3</sup> from *a* to *i*) in phosphate buffer aqueous solution (pH 7.20) at 25 °C, λ = 436.0 nm.

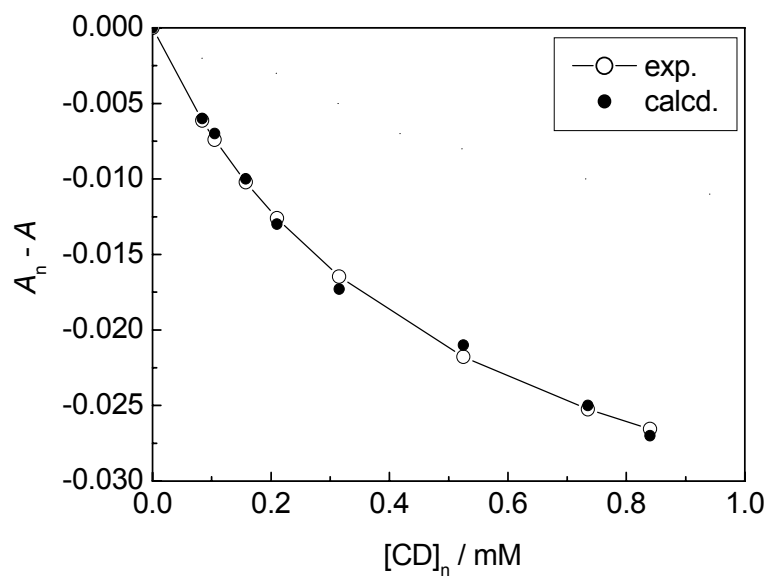

**Fig. S6** Curve-fitting analyses for the complexation of 4-AAB with  $\beta$ -CD in phosphate buffer aqueous solution (pH 7.20) at 25 °C. ( $\lambda = 436.0 \text{ nm}$ )
